# Supplementary material for: First forcing estimates from the future CMIP6 scenarios of anthropogenic aerosol optical properties and an associated Twomey effect
Source: Copernicus journal article supplement (doi:10.5194/gmd-12-989-2019), 2019-03-21
Supplement: Supplementary file 1 [file gmd-12-989-2019-supplement.zip]

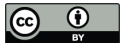

## *Supplement of*

# **First forcing estimates from the future CMIP6 scenarios of anthropogenic aerosol optical properties and an associated Twomey effect**

**S. Fiedler et al.**

*Correspondence to:* Stephanie Fiedler ([stephanie.fiedler@mpimet.mpg.de](mailto:stephanie.fiedler@mpimet.mpg.de))

- [gmd-12-989-2019-supplement-title-page.pdf](#)
- [MACv2.0-SP\\_AIM-SSP3-LowNTCF.nc](#)
- [MACv2.0-SP\\_AIM-SSP3-Ref-SPA0.nc](#)
- [MACv2.0-SP\\_GCAM4-SSP4-34-SPA4.nc](#)
- [MACv2.0-SP\\_GCAM4-SSP4-60-SPA4.nc](#)
- [MACv2.0-SP\\_IMAGE-SSP1-19-SPA1.nc](#)
- [MACv2.0-SP\\_IMAGE-SSP1-26-SPA1.nc](#)
- [MACv2.0-SP\\_MESSAGE-GLOBIOM-SSP2-45-SPA2.nc](#)
- [MACv2.0-SP\\_REMIND-MAGPIE-SSP5-34-OS.nc](#)
- [MACv2.0-SP\\_REMIND-MAGPIE-SSP5-Ref.nc](#)
- [README.txt](#)

The copyright of individual parts of the supplement might differ from the CC BY 4.0 License.
